# Supplementary material
Source: publisher site journal article supplement (https://www.degruyterbrill.com/publication/isbn/9783110185584/downloadAsset/9783110185584_Inhaltsverzeichnis.pdf)
Supplement: Supplementary file 1 [file 9783110185584_Inhaltsverzeichnis.pdf]

# Inhalt

|                                                                                                 |    |
|-------------------------------------------------------------------------------------------------|----|
| <b>Vorwort</b> .....                                                                            | V  |
| <b>1.     Gegenstandstheorie und Methodologie der<br/>      Gesprächsanalyse</b> .....          | 1  |
| 1.1     Warum Gesprächsanalyse? .....                                                           | 1  |
| 1.2     Gegenstandstheoretische Grundannahmen.....                                              | 3  |
| 1.2.1     Konstitutivität.....                                                                  | 4  |
| 1.2.2     Prozessualität.....                                                                   | 5  |
| 1.2.3     Interaktivität.....                                                                   | 7  |
| 1.2.4     Methodizität.....                                                                     | 9  |
| 1.2.5     Pragmatizität.....                                                                    | 11 |
| 1.3     Sprachtheoretische Grundpositionen.....                                                 | 13 |
| 1.3.1     Untersuchungsbereiche der Interaktionalen Linguistik.....                             | 17 |
| 1.3.2     Verhältnis zu anderen linguistischen Theorieansätzen.....                             | 18 |
| 1.4     Methodologische Grundprinzipien.....                                                    | 24 |
| 1.4.1     Datenzentrierung.....                                                                 | 26 |
| 1.4.2     Rekonstruktionshaltung und display-These.....                                         | 27 |
| 1.4.3     Unterstellung von Sinnhaftigkeit und systematischer Orga-<br>nisiertheit.....         | 30 |
| 1.4.4     Form-Funktions-Zusammenhänge: Das 'Wie' und das<br>'Wozu' von Gesprächspraktiken..... | 32 |
| 1.4.4.1     Das 'Wie': Sprachliche Formen als Ressourcen.....                                   | 33 |
| 1.4.4.2     Das 'Wozu': Pragmatische Aufgaben, Probleme und Funk-<br>tionen.....                | 36 |
| 1.4.5     Mehrebenenbetrachtung.....                                                            | 43 |
| 1.4.6     Sequenzanalyse und Kontextualität.....                                                | 46 |
| 1.4.7     Detailgenauigkeit und Explizitheit.....                                               | 49 |
| 1.4.8     Verhältnis zu anderen linguistischen Methodologien.....                               | 52 |
| 1.5     Gesprächsanalyse.....                                                                   | 55 |
| 1.5.1     Analysebeginn.....                                                                    | 55 |
| 1.5.2     Analysegesichtspunkte: Detaillierte Sequenzanalyse am<br>Einzelfall.....              | 57 |
| 1.5.2.1     Paraphrase und Handlungsbeschreibung.....                                           | 59 |
| 1.5.2.2     Äußerungsgestaltung und Formulierungsdynamik.....                                   | 60 |
| 1.5.2.3     Timing.....                                                                         | 64 |
| 1.5.2.4     Kontextanalyse.....                                                                 | 65 |

|           |                                                                                                  |            |
|-----------|--------------------------------------------------------------------------------------------------|------------|
| 1.5.2.5   | Projektionen.....                                                                                | 71         |
| 1.5.2.6   | Interaktive Konsequenzen.....                                                                    | 74         |
| 1.5.2.7   | Sequenzmuster und Makroprozesse.....                                                             | 79         |
| 1.5.3     | Analyseresourcen: Hintergrundwissen und Variationsverfahren.....                                 | 81         |
| 1.5.3.1   | Das Wissensparadox: Methodische Fremdheit und notwendiges Hintergrundwissen.....                 | 82         |
| 1.5.3.2   | Variationsverfahren: Bestimmung des Faktischen durch das Mögliche.....                           | 89         |
| 1.5.4     | Analysevertiefung: Fallübergreifende Analyse.....                                                | 94         |
| 1.5.4.1   | Kookkurrenzen.....                                                                               | 98         |
| 1.5.4.2   | Varianz von Komponenten und Formen.....                                                          | 99         |
| 1.5.4.3   | Marginale Fälle und benachbarte Praktiken.....                                                   | 100        |
| 1.5.4.4   | Abweichende Fälle und Reparaturverfahren.....                                                    | 101        |
| 1.5.4.5   | Strategische Nutzungen.....                                                                      | 103        |
| 1.5.4.6   | Vorkommen in unterschiedlichen Kontexten.....                                                    | 104        |
| 1.5.4.7   | Hypothesentestung.....                                                                           | 104        |
| 1.5.4.8   | Sprachvergleichende Untersuchungen.....                                                          | 105        |
| 1.6       | Gütekriterien für Gesprächsanalysen.....                                                         | 106        |
| 1.6.1     | Qualität der Datenmaterialien.....                                                               | 106        |
| 1.6.2     | Durchführung und Präsentation von Gesprächsanalysen...                                           | 107        |
| 1.6.3     | Generalisierbarkeit.....                                                                         | 109        |
| <b>2.</b> | <b>Der deontische Infinitiv.....</b>                                                             | <b>113</b> |
| 2.1       | Sprachtheoretische Positionen der <i>construction grammar</i> .....                              | 114        |
| 2.1.1     | Verhältnis zu anderen linguistischen Theorieansätzen.....                                        | 118        |
| 2.2       | Methodische Fragen der Untersuchung grammatischer Konstruktionen.....                            | 119        |
| 2.2.1     | Vergleich der Gesprächsanalyse mit anderen Methoden der Syntaxforschung.....                     | 122        |
| 2.2.1.1   | Argumente für intuitionistische Vorgehensweisen.....                                             | 122        |
| 2.2.1.2   | Argumente für die naturalistische Untersuchung.....                                              | 123        |
| 2.2.1.3   | Korpusbeschreibung.....                                                                          | 128        |
| 2.3       | Syntax der deontischen Infinitivkonstruktion.....                                                | 129        |
| 2.3.1     | Deontische Infinitivkonstruktionen als Grammatikalisierung elliptischer Modalkonstruktionen..... | 135        |
| 2.4       | Quellen der Interpretation deontischer Infinitivkonstruktionen.....                              | 138        |
| 2.4.1     | Konditionelle Relevanz.....                                                                      | 140        |
| 2.4.2     | Aktivitäts- und Sachverhalts- <i>frames</i> .....                                                | 142        |

|           |                                                                                                                |            |
|-----------|----------------------------------------------------------------------------------------------------------------|------------|
| 2.4.3     | Ethnographisches Wissen.....                                                                                   | 148        |
| 2.4.4     | Sprecherkonsistenzannahme.....                                                                                 | 149        |
| 2.4.5     | Modale, kataphorische und anaphorische Qualifikation.....                                                      | 151        |
| 2.5       | Modalitäten deontischer Infinitivkonstruktionen.....                                                           | 155        |
| 2.5.1     | Typen deontischer Handlungen durch freie Infinitivkonstruktionen.....                                          | 157        |
| 2.5.2     | Deskriptive Mitbedeutung deontischer Infinitivkonstruktionen.....                                              | 163        |
| 2.6       | Agens der deontischen Infinitivkonstruktion.....                                                               | 165        |
| 2.6.1     | Vagheit des Agens.....                                                                                         | 168        |
| 2.7       | Argumentstrukturen deontischer Infinitivkonstruktionen.....                                                    | 170        |
| 2.8       | Sequenzielle Organisation von deontischen Infinitivkonstruktionen.....                                         | 180        |
| 2.8.1     | Positionierung von deontischen Infinitivkonstruktionen in Interaktionssequenzen.....                           | 181        |
| 2.8.1.1   | Sequenziell integrierte DIK.....                                                                               | 181        |
| 2.8.1.2   | Sequenziell nicht integrierte DIK.....                                                                         | 187        |
| 2.8.1.3   | Empraktische DIK.....                                                                                          | 189        |
| 2.8.2     | Deontische Infinitivkonstruktionen innerhalb von Interaktionsbeiträgen: Formulierungsdynamik und Subtypen..... | 191        |
| 2.8.2.1   | Subtypen deontischer Infinitivkonstruktionen.....                                                              | 193        |
| 2.8.3     | Beteiligungsstrukturelle und interaktionstypologische Aspekte.....                                             | 201        |
| 2.8.4     | Deontische Infinitivkonstruktionen <i>versus</i> Modalkonstruktionen und Imperative.....                       | 201        |
| 2.9       | Fazit der grammatischen Untersuchung.....                                                                      | 206        |
| <b>3.</b> | <b>Bedeutungskonstitution durch Kontrastierung.....</b>                                                        | <b>210</b> |
| 3.1       | Bedeutungskonstitution.....                                                                                    | 211        |
| 3.1.1     | Beiträge aus der Gesprächsforschung.....                                                                       | 213        |
| 3.1.2     | Beiträge aus der Kognitionswissenschaft.....                                                                   | 218        |
| 3.1.3     | Der Ansatz der vorliegenden Untersuchung.....                                                                  | 222        |
| 3.2       | Kontrastierung als Formulierungsverfahren.....                                                                 | 227        |
| 3.2.1     | Forschungen zu Kontrasten.....                                                                                 | 229        |
| 3.3       | Methodische Fragen der Untersuchung der Bedeutungskonstitution durch Kontrastierungen.....                     | 238        |
| 3.4       | Drei Kontrastierungspraktiken.....                                                                             | 242        |
| 3.4.1     | Korrektiver Kontrast: Offenlegung und Korrektur vorangegangener Kategorisierungen.....                         | 242        |

|           |                                                                                                                               |            |
|-----------|-------------------------------------------------------------------------------------------------------------------------------|------------|
| 3.4.1.1   | Asymmetrischer Perspektivenkontrast und Meta-<br>Interpretation.....                                                          | 244        |
| 3.4.1.2   | Inferenzielle Logik und interaktive Funktionen des korrek-<br>tiven Kontrasts.....                                            | 249        |
| 3.4.2     | Differenzierender Kontrast.....                                                                                               | 251        |
| 3.4.2.1   | Relevante Binnendifferenzen und überlegene Alternati-<br>ven.....                                                             | 263        |
| 3.4.3     | Explikativer Kontrast.....                                                                                                    | 267        |
| 3.4.3.1   | Erwartungsenttäuschung und die argumentativ-seman-<br>tische Doppelfunktion des explikativen Kontrasts.....                   | 268        |
| 3.4.3.2   | Projektion und Funktion des Kontrasts und Restriktion<br>seiner Interpretation durch die Abweichungskategorisie-<br>rung..... | 272        |
| 3.5       | Zwei allgemeine Interpretationsstrategien für Kontrastie-<br>ungen.....                                                       | 276        |
| 3.5.1     | <i>frame</i> -basierte Interpretation.....                                                                                    | 277        |
| 3.5.2     | Kontrastmaximierung.....                                                                                                      | 284        |
| 3.6       | Interpretative Effekte von Kontrastierungen.....                                                                              | 289        |
| 3.6.1     | Interpretative Anreicherung und Lesartenselektion.....                                                                        | 291        |
| 3.6.2     | Interpretative Verschiebung und interpretative Reduk-<br>tion.....                                                            | 297        |
| 3.6.3     | Profilierung von konzeptuellen Aspekten.....                                                                                  | 300        |
| 3.7       | Fazit zur Gesprächssemantik.....                                                                                              | 302        |
| 3.8       | Methodologisches Fazit.....                                                                                                   | 310        |
| <b>4.</b> | <b>Transkriptionskonventionen.....</b>                                                                                        | <b>313</b> |
| <b>5.</b> | <b>Literaturverzeichnis.....</b>                                                                                              | <b>315</b> |
|           | <b>Sachregister.....</b>                                                                                                      | <b>347</b> |
